# Supplementary material
Source: PubMed Central journal article supplement (PMC6041769)
Supplement: ma8b00892_si_001.pdf [file ma8b00892_si_001.pdf]

## Supporting Information

### Effects of surfactant and urea on dynamics and viscoelastic properties of hydrophobically assembled supramolecular hydrogel

*Marko Mihajlovic<sup>1,2</sup>, Hans M. Wyss<sup>2,3</sup> and Rint P. Sijbesma<sup>1,2,\*</sup>*

<sup>1</sup>Laboratory of Macromolecular and Organic Chemistry, Department of Chemical Engineering and Chemistry, Eindhoven University of Technology, P.O. Box 513, 5600 MB Eindhoven, The Netherlands

<sup>2</sup>Institute for Complex Molecular Systems, Eindhoven University of Technology, P.O. Box 513, 5600 MB Eindhoven, The Netherlands

<sup>3</sup>Department of Mechanical Engineering, Eindhoven University of Technology, P.O. Box 513, 5600 MB Eindhoven, The Netherlands

\* e-mail: [r.p.sijbesma@tue.nl](mailto:r.p.sijbesma@tue.nl)

## Characteristics of the synthesized segmented copolymer PE PEG2000

Table S1. Characteristics of the segmented copolymer (obtained by Gel Permeation Chromatography)

| sample     | $M_w$ (kg/mol) | $M_n$ (kg/mol) | $M_w/M_n$ |
|------------|----------------|----------------|-----------|
| PE PEG2000 | 87             | 42             | 2.07      |

### Strain-dependent measurements

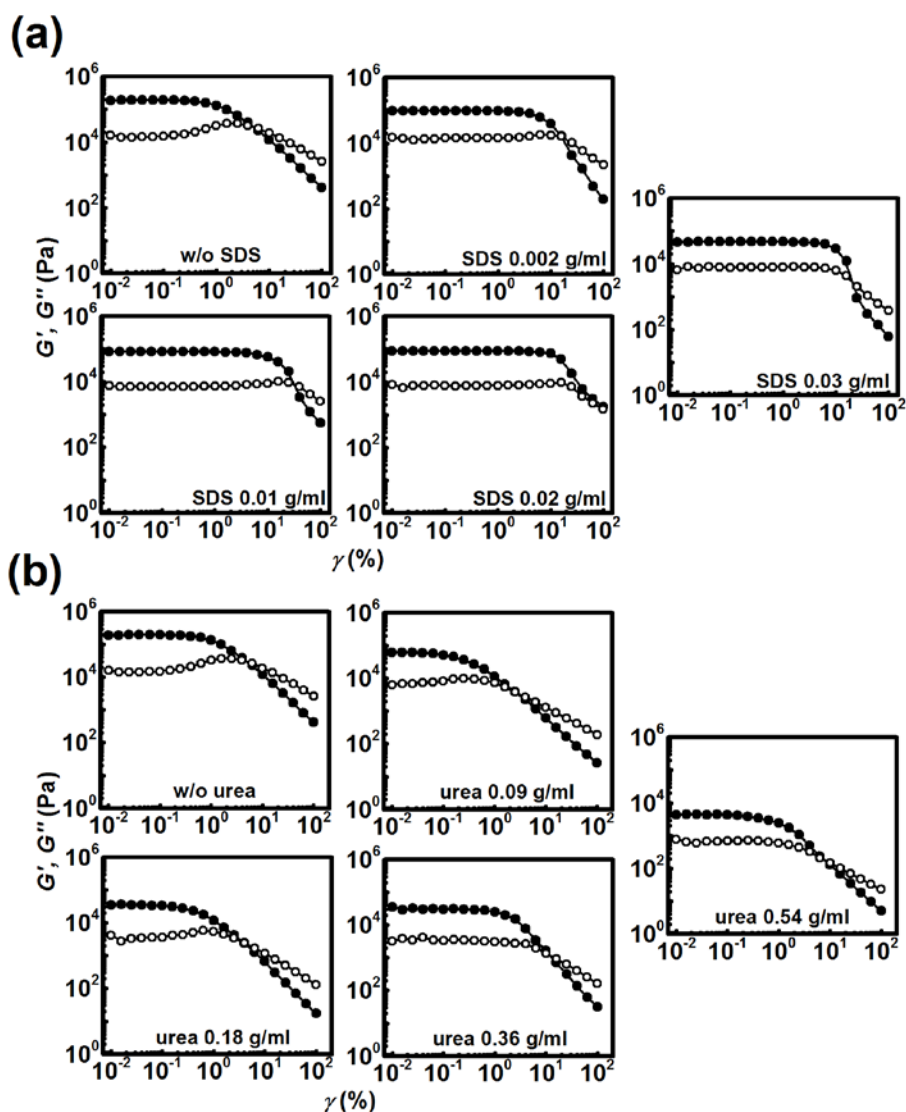

Figure S1. Viscoelastic properties of hydrogels in the presence of SDS and urea. Strain sweep at  $\omega=1$  rad/s, at 25°C of the PE PEG2000 at (a) varying SDS concentrations and (b) varying urea concentrations, as indicated in the panels (closed symbols  $G'$ , open symbols  $G''$ ).

## Analysis stress relaxation data

The frequency-dependent viscoelastic moduli  $G'(\omega)$  and  $G''(\omega)$  can be derived directly from the Fourier transform of a stress relaxation test, as

$$G^*(\omega) = i\omega \int_0^{\infty} G(t) e^{-i\omega t} dt, \quad (1)$$

where  $G(t) = \sigma(t)/\gamma_0$  is the time-dependent modulus, with  $\sigma(t)$  the time dependent stress after a step in the strain of magnitude  $\gamma_0$ .  $G'(\omega)$  and  $G''(\omega)$  are the real and imaginary parts of  $G^*(\omega)$ , respectively.

Brief description of the Matlab function 'Gstar\_from\_G\_t'

The MATLAB function `Gstar_from_G_t.m` calculates  $G^*(\omega)$  from  $G(t)$ , using Eq.1. As the experimental data for  $G(t)$  is always limited to a finite range of time scales, the code extrapolates  $G(t)$  at short and long times, beyond the range that was measured experimentally. To do so, the code uses a power-law fit to both the upper and the lower end of the measured  $G(t)$ <sup>1</sup>. The data in between are integrated exactly from the experimental data, assuming power-law behavior between consecutive data points. In each section, including the initial and final power-law regimes, the relevant contribution to the integral in Eq.1 is calculated, using the incomplete gamma function<sup>2</sup>, which allows us to calculate the definite integral for each section.

Function description:

DESCRIPTION: Function that calculates the frequency-dependent storage and loss moduli from the time-dependent modulus.

The data (on a time interval  $[t_{\min} .. t_{\max}]$ ) is divided into sections, which are each approximated as a power-law function. The relevant Fourier integral for each of these sections can be calculated using the incomplete gamma function `gammainc(x,a)`

INPUT PARAMETERS:

t: Time array [s]

G\_t: Time-dependent modulus G(t) [Pa]

OUTPUT PARAMETERS:

omega: Array of angular frequency [rad/s]

G\_stor: Array of Storage modulus [Pa]

G\_loss: Array of Loss modulus [Pa]

---

<sup>1</sup>The width of this upper and lower end of time scales is controlled by the parameter *sectionspan*, which is currently set to a value of 5 (which means that the width of the sections used for the power law fit spans over a factor of 5.

<sup>2</sup> in Matlab, this is implemented by the built-in `igamma` function.

## Fourier transform of the stress-relaxation responses in urea-containing samples

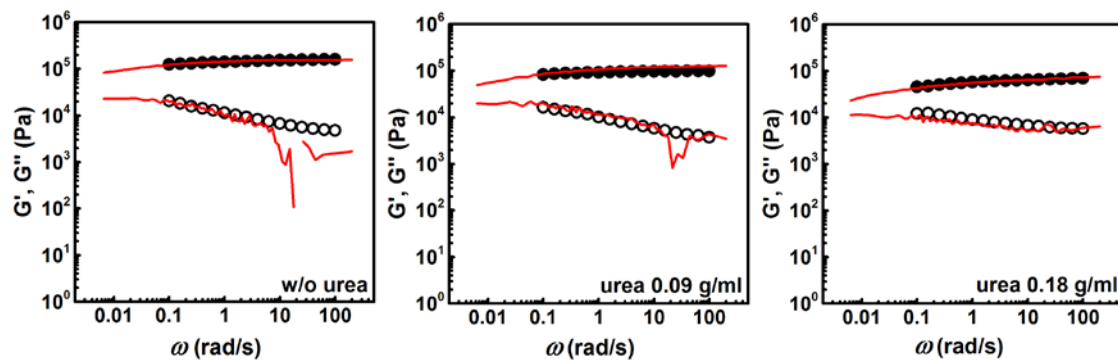

**Figure S2. Fourier transform of the stress-relaxation responses in urea-containing samples.** Storage and loss modulus  $G'(\omega)$  and  $G''(\omega)$  as a function of frequency. Comparison of experimental data obtained from a frequency sweep (symbols), and data obtained from Fourier transforming the stress-relaxation data shown in Figure 5b in the main text (red lines). Varying urea concentrations are indicated in the panels (closed symbols  $G'$ , open symbols  $G''$ ).
